# Supplementary material for: The miR-27a/FOXJ3 Axis Dysregulates Mitochondrial Homeostasis in Colorectal Cancer Cells
Source: MDPI journal article supplement (doi:10.3390/cancers13194994), 2021-10-05

# The miR-27a/FOXJ3 axis dysregulates mitochondrial homeostasis in colorectal cancer cells

Giovannina Barisciano<sup>1\*</sup>, Manuela Leo<sup>1\*</sup>, Livio Muccillo<sup>1</sup>, Erica Pranzini<sup>2</sup>, Matteo Parri<sup>2</sup>,  
Vittorio Colantuoni<sup>1</sup>, Maria Letizia Taddei<sup>3</sup> and Lina Sabatino<sup>1§</sup>

## Content of Supplementary Information

Supplementary Figure S1

Supplementary Figure S2

Supplementary Table S1

Supplementary Figure S1

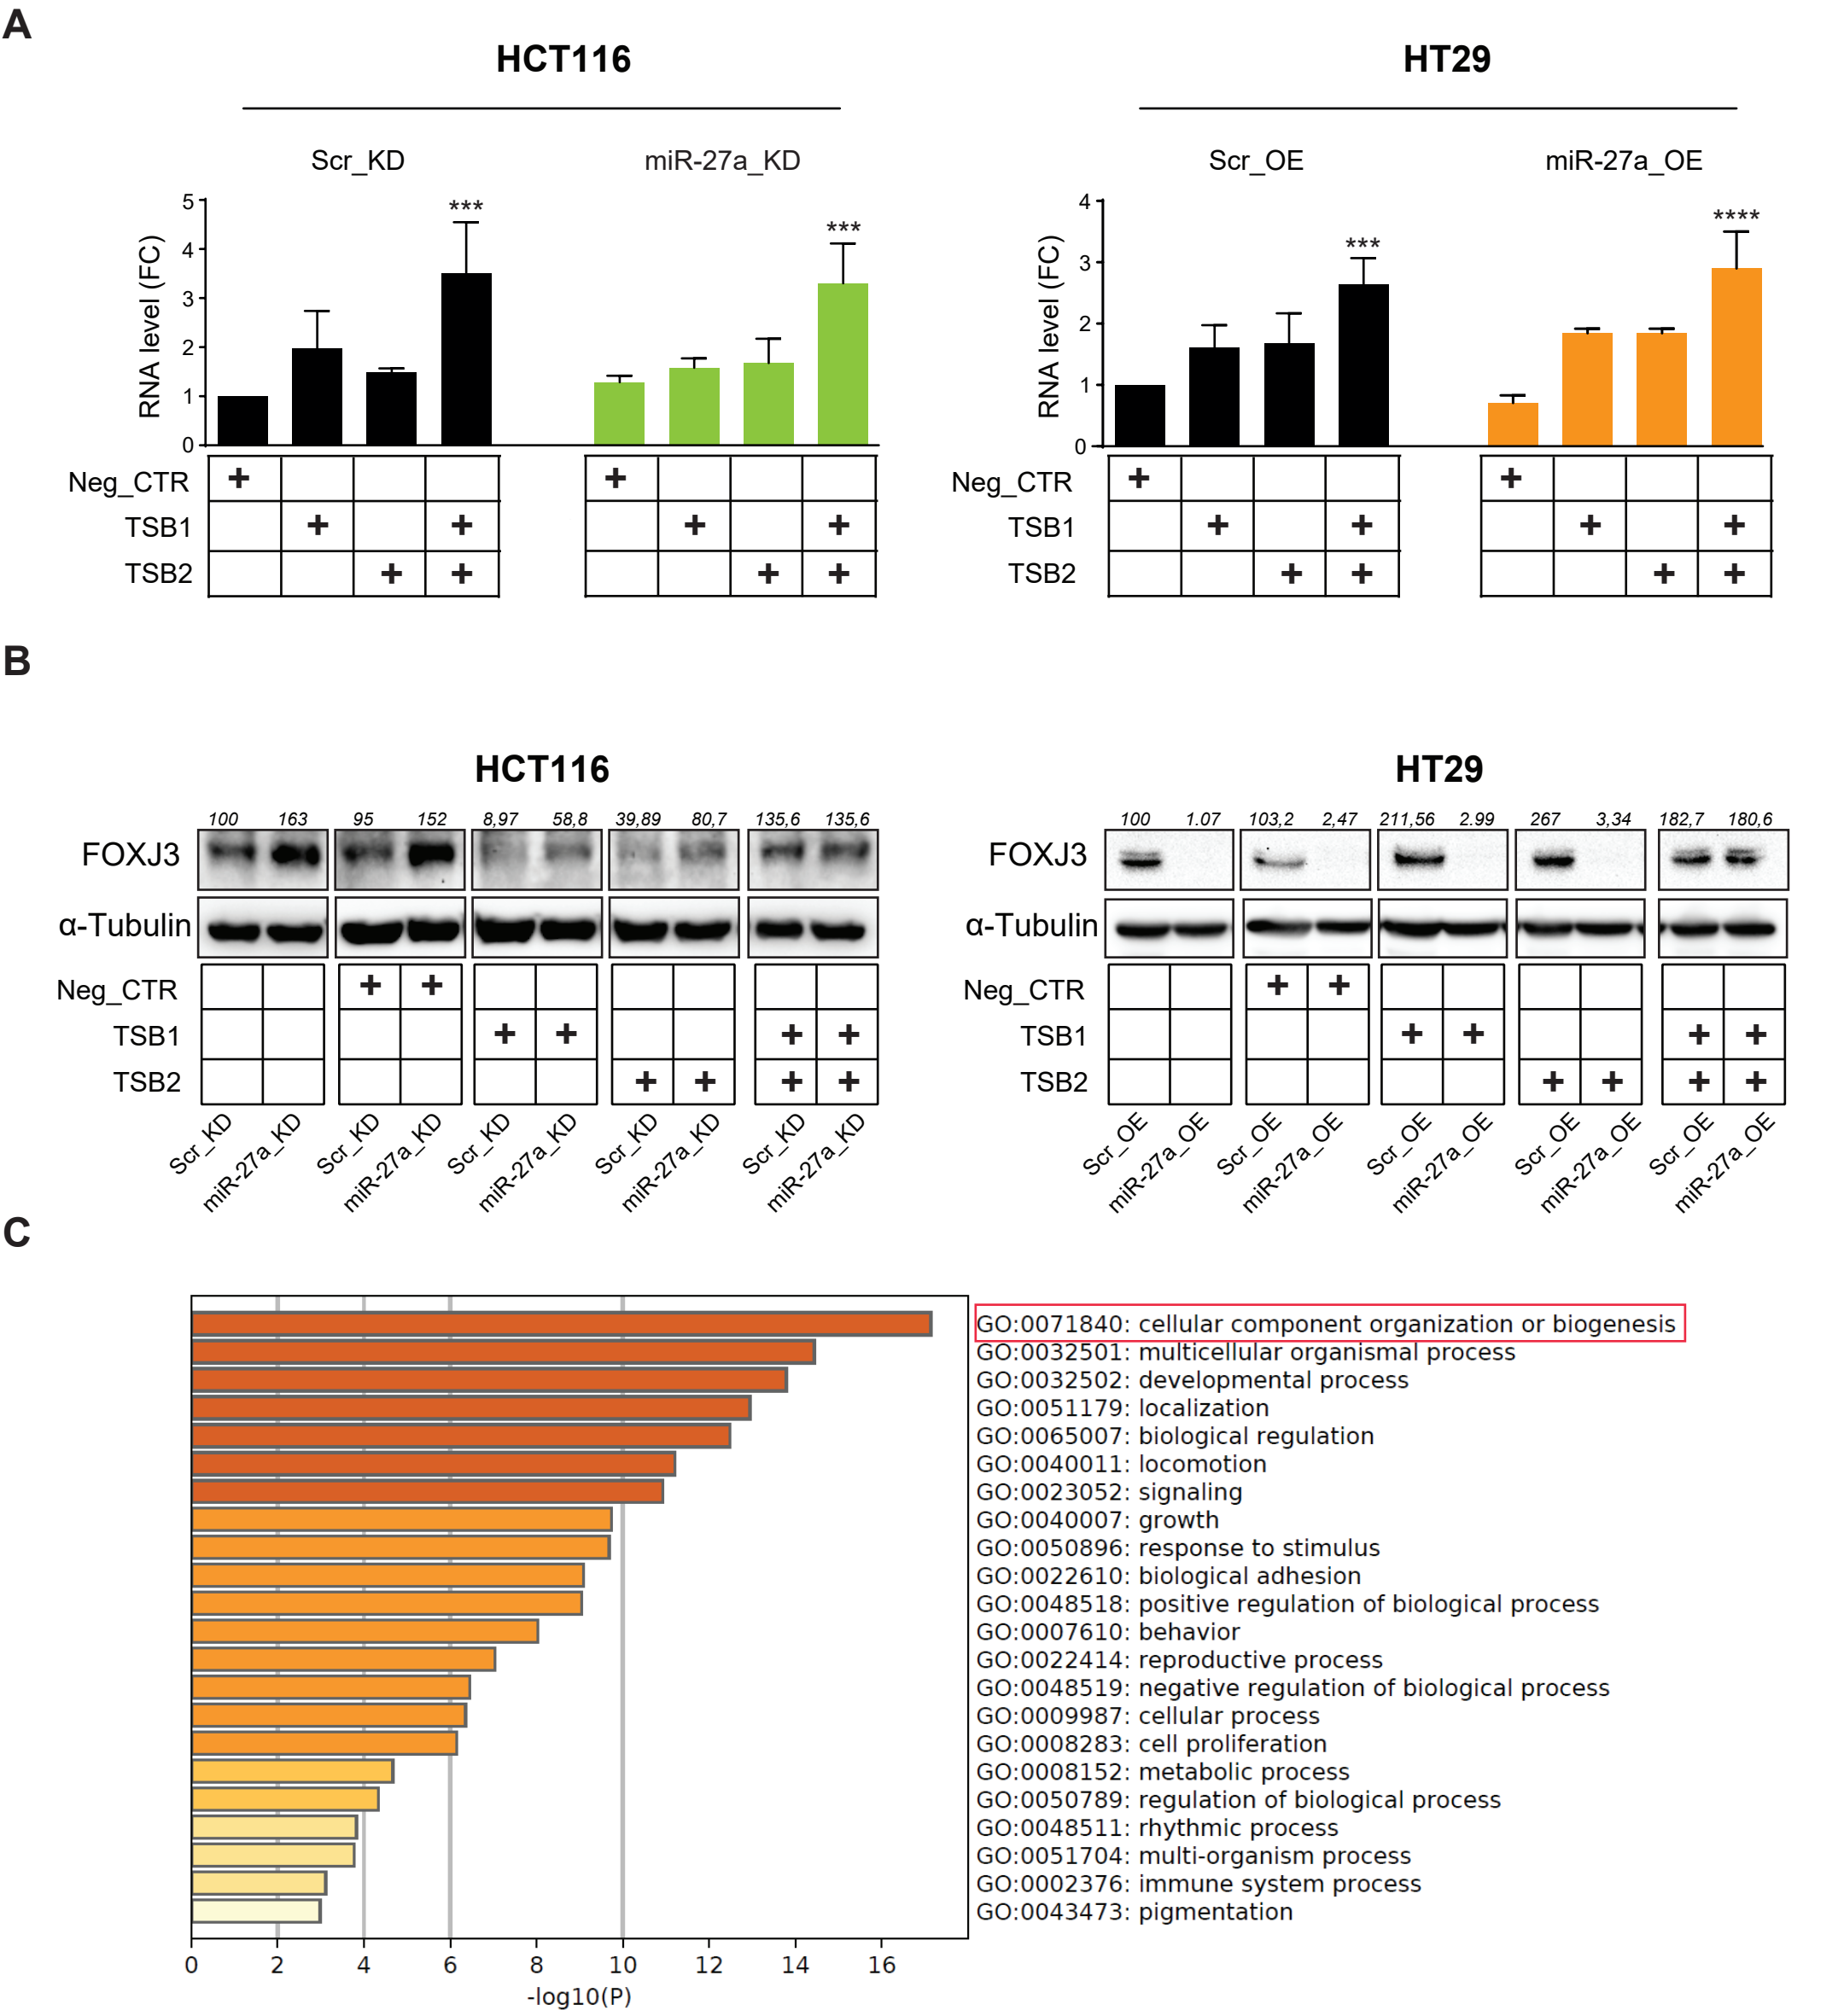

Supplementary Figure S1

Analysis of FOXJ3 expression in the cell model system upon transfection of the Target Site Blockers (TSB).

(A) qRT-PCR analysis of RNA from Scr\_KD or miR-27a\_KD and Scr\_OE or miR-27a\_OE cells transfected with TSB1 and TSB2, directed against the seed-sequences recognized by miR-27a on FOXJ3 mRNA, or the negative control.

(B) Western blot analysis for FOXJ3 on extracts from Scr\_KD or miR-27a\_KD and in Scr\_OE or miR-27a\_OE cells transfected as in A.

(C) Gene ontology analysis of the major pathways modulated by miR-27a according to the TCGA-COADREAD dataset patients. The graph bars illustrate the most influenced pathways among which “cellular component organization or biogenesis” is the top one (a deeper colour indicates a smaller p-value).

Supplementary Figure S2

| <i>miRNA: hsa-miR-27a_3p    Sequence: 3' CGCCUUGAAUCGGUGACACUU 5'</i> |                                                                                                                                                                                                 |                                                                                                                                                 |
|-----------------------------------------------------------------------|-------------------------------------------------------------------------------------------------------------------------------------------------------------------------------------------------|-------------------------------------------------------------------------------------------------------------------------------------------------|
| <i>Predicted target</i>                                               | <i>Sequence</i>                                                                                                                                                                                 | <i>Energy</i>                                                                                                                                   |
| <i>PGC1-α</i><br>NM_001330751.2                                       | <div>PGC1-α:                    TGAGTGAAT<b>CCACTGT</b>TGTC<br/>                                           <br/>hsa-miR-27a_3p        CGCCUUGAAUC<b>GGUGACA</b>CUU</div>                        | Energy-7.26 kcal/mol<br>Hybridization Energy-10.31 kcal/mol<br>Unfolding Energy - Target1.09 kcal/mol<br>Unfolding Energy - Query1.96 kcal/mol  |
|                                                                       | <div>PGC1-α:                    AT<b>GAAC</b>AC<b>AGCTGCTG</b>AAGAG<br/>                                           <br/>hsa-miR-27a_3p        CGC<b>CUUGAAUCGGUGAC</b>ACUU</div>                | Energy-9.58 kcal/mol<br>Hybridization Energy-14.59 kcal/mol<br>Unfolding Energy - Target3.04 kcal/mol<br>Unfolding Energy - Query1.97 kcal/mol  |
|                                                                       | <div>PGC1-α:                    AGTCA<b>AGCCACT</b>ACAGA<br/>                                           <br/>hsa-miR-27a_3p        CGCCUUGAA<b>UCGGUGA</b>CACUU</div>                           | Energy-9.2 kcal/mol<br>Hybridization Energy-11.86 kcal/mol<br>Unfolding Energy - Target0.7 kcal/mol<br>Unfolding Energy - Query1.96 kcal/mol    |
|                                                                       | <div>PGC1-α:                    AGAGTAAC<b>AGCCGCT</b>GGCGA<br/>                                           <br/>hsa-miR-27a_3p        CGCCUUGAA<b>UCGGUGA</b>CACUU</div>                        | Energy-8.6 kcal/mol<br>Hybridization Energy-13.87 kcal/mol<br>Unfolding Energy - Target3.3 kcal/mol<br>Unfolding Energy - Query1.97 kcal/mol    |
| <i>NRF1</i><br>NM_001040110.2                                         | <div>NRF1:                    ATTTTTTATC<b>GTCATTGTGAA</b><br/>                                           <br/>hsa-miR-27a_3p        GCCUUGAAU<b>CGGUGACACUU</b></div>                          | Energy-9.96 kcal/mol<br>Hybridization Energy-15.09 kcal/mol<br>Unfolding Energy - Target3.16 kcal/mol<br>Unfolding Energy - Query1.97 kcal/mol  |
|                                                                       | <div>NRF1:                    CGG<b>AATTCCAGTCTCTGTG</b>GA<br/>                                           <br/>hsa-miR-27a_3p        CGCCU<b>UGAAUCGGUGACACUU</b></div>                         | Energy-10.88 kcal/mol<br>Hybridization Energy-21.69 kcal/mol<br>Unfolding Energy - Target8.84 kcal/mol<br>Unfolding Energy - Query1.97 kcal/mol |
| <i>TFAM</i><br>NM_001270782.2                                         | <div>TFAM:                    TCCAC<b>TCACAGCCA</b>TTCTCCCTC<br/>                                           <br/>hsa-miR-27a_3p        CGCCU<b>UGAAUCGGU</b>GACACUU</div>                       | Energy-7.05 kcal/mol<br>Hybridization Energy-9.6 kcal/mol<br>Unfolding Energy - Target0.58 kcal/mol<br>Unfolding Energy - Query1.97 kcal/mol    |
|                                                                       | <div>TFAM:                    CAG<b>GGA</b>CAGTG<b>TTGCCATTGGTGAA</b><br/>                                           <br/>hsa-miR-27a_3p        CG<b>CCUUGAAUCGGUGACACUU</b></div>              | Energy-7.05 kcal/mol<br>Hybridization Energy-9.6 kcal/mol<br>Unfolding Energy - Target0.58 kcal/mol<br>Unfolding Energy - Query1.97 kcal/mol    |
|                                                                       | <div>TFAM                    GCA<b>GAGCTGTGC</b>ACCGG<b>CTGTGGA</b><br/>                                           <br/>hsa-miR-27a_3p        CGC<b>CUUGAAUCGGU</b>        <b>GACACUU</b></div> | Energy-4.53 kcal/mol<br>Hybridization Energy-16.23 kcal/mol<br>Unfolding Energy - Target9.73 kcal/mol<br>Unfolding Energy - Query1.97 kcal/mol  |

IntaRNA - RNA-RNA interaction <http://rna.informatik.uni-freiburg.de/IntaRNA/Input.jsp>

Supplementary Figure S2

The putative recognition sequences for miR-27a on the mRNAs corresponding to some components of the mitochondrial biogenetic process are illustrated along with their hybridization free energies.



Supplementary Table S1

|                                                                   |                                              |                                   |                                            |                                            |                                    |                                             |
|-------------------------------------------------------------------|----------------------------------------------|-----------------------------------|--------------------------------------------|--------------------------------------------|------------------------------------|---------------------------------------------|
| Supplementary Table S1. A                                         |                                              |                                   |                                            |                                            |                                    |                                             |
| miRCURY LNA miRNA Power Target Site Blockers (Qiagen cod. 339194) |                                              |                                   |                                            |                                            |                                    |                                             |
| Seq_ Negative Control                                             |                                              | ACGTCTATACGCCCCA                  |                                            |                                            |                                    |                                             |
| Seq_TSB1 (794_816)                                                |                                              | TCACAGTG TTGATT GCCA GAGTT        |                                            |                                            |                                    |                                             |
| Seq TSB2 (3247_3266)                                              |                                              | AGGCG CAGTGGCT CATGTCT            |                                            |                                            |                                    |                                             |
| Supplementary Table S1. B                                         |                                              |                                   |                                            |                                            |                                    |                                             |
| Cell Signaling Technology<br>(Beverly MA USA)                     | Sigma Aldrich<br>(St Louis MO USA)           | Bioss antibody<br>(Woburn MA USA) | BETHYL Laboratories<br>(Montgomery TX USA) | ABCCAM<br>(Cambridge UK)                   | Invitrogen™<br>(Carlsbad, CA, USA) | Santa Cruz biotechnology<br>(Dallas TX USA) |
| Mitochondrial Dynamics Antibody Sampler KitII<br>(#74792)         | β-Actin<br>(#F-3022)                         | NRF 1<br>(#BS - 1342R)            | TFAM<br>(#A303 - 226A -T)                  | OXPPOS WB antibody cocktail<br>(#ab110411) | Alexa Fluor™ 633<br>(A20005)       | PGC1 -α<br>(#518025)                        |
| Mitophagy Antibody Sampler Kit (#43110)                           | α-Tubulin<br>(#T5168)                        |                                   | FOXJ3<br>(#A303 - 107A -T)                 |                                            |                                    |                                             |
| TOM 20<br>(#42406)                                                | FOXJ3<br>(#SAB45 00907)                      |                                   |                                            |                                            |                                    |                                             |
|                                                                   | TOM 20<br>(#HPA 011562)                      |                                   |                                            |                                            |                                    |                                             |
| Supplementary Table S1. C                                         |                                              |                                   |                                            |                                            |                                    |                                             |
| Gene                                                              | Forward Primer                               |                                   |                                            | Reverse Primer                             |                                    |                                             |
| FOXJ3                                                             | 5' – AGC CTA ACG TCT ATG GAC TGG T – 3'      |                                   |                                            | 5'-GGT CAA GGA GTG CATTCT TCT TA - 3'      |                                    |                                             |
| PGC1α                                                             | 5' – AAG GTC TCC AGG CAG TAG AT-3'           |                                   |                                            | 5' - AAG GGA GAA TTT CGG TGC GT - 3'       |                                    |                                             |
| NRF1                                                              | 5' – TCT CAC CCT CCA AAC CTA AC – 3'         |                                   |                                            | 5' – CCC GAC CTG TAG AGT ACT TG – 3'       |                                    |                                             |
| TFAM                                                              | 5' – GGC AAG TTG TCC AAA GAA ACC – 3'        |                                   |                                            | 5' – GCA TCT GGG TTC TGA GCT TTA - 3'      |                                    |                                             |
| 18S                                                               | 5' – GGG AGC CTG AGA AAC GGC -3'             |                                   |                                            | 5' –GGG TCG GGA GTG GGT AATTT – 3'         |                                    |                                             |
| SOX9                                                              | 5' – CTC AAC GGG TCC CTG AGT TG – 3'         |                                   |                                            | 5' – TCC GTT TTG GTT TTG GAG CG – 3'       |                                    |                                             |
| Claudin1                                                          | 5' – GAT AAT TGG AGT GAA TGA ATG AAA AG – 3' |                                   |                                            | 5' – GTT TCA GGG CGG CTC AC – 3'           |                                    |                                             |
| tRNA-Leu                                                          | 5' -CAC CCA AGA ACA GGG TTT GT – 3'          |                                   |                                            | TGGCC ATGG ATATGT TGT TA – 3'              |                                    |                                             |
| MT - RNR 2                                                        | 5' - CGA AAG GAC AAG AGA AAT AAG G – 3'      |                                   |                                            | 5' - CTG TAA AGT TTT AAG TTT TAT GCG – 3'  |                                    |                                             |
|                                                                   |                                              |                                   |                                            |                                            |                                    |                                             |

Supplementary Table S1

The table reports the sequences of the Target Site Blockers (TSB) and negative control (1A), the antibodies used throughout the manuscript (1B) and the sequences of the primers used for qRT-PCR and q-PCR (1C).

# Original images for blots/gels

The miR-27a/FOXJ3 axis dysregulates mitochondrial homeostasis in colorectal cancer cells

Giovannina Barisciano<sup>1\*</sup>, Manuela Leo<sup>1\*</sup>, Livio Muccillo<sup>1</sup>, Erica Pranzini<sup>2</sup>, Matteo Parri<sup>2</sup>,  
Vittorio Colantuoni<sup>1</sup>, Maria Letizia Taddei<sup>3</sup> and Lina Sabatino<sup>1§</sup>

Figure S1C

HCT116 - Scr\_KD and miR-27a\_KD

FOXJ3

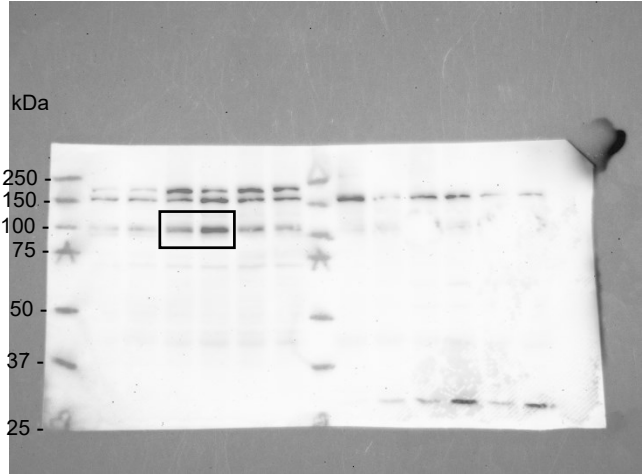

$\alpha$ -Tubulin for FOXJ3

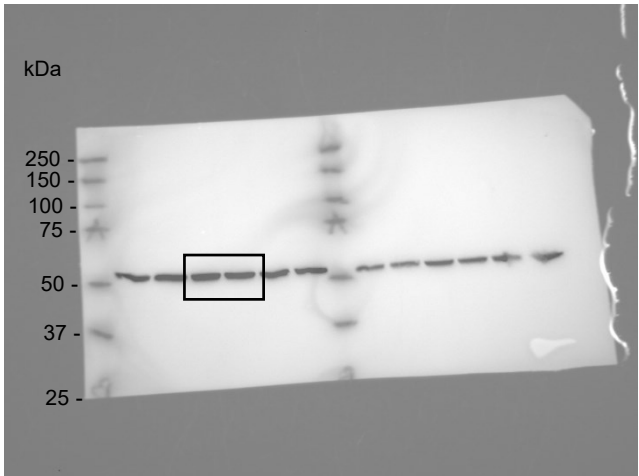

HT29 - Scr\_OE and miR-27a\_OE

FOXJ3

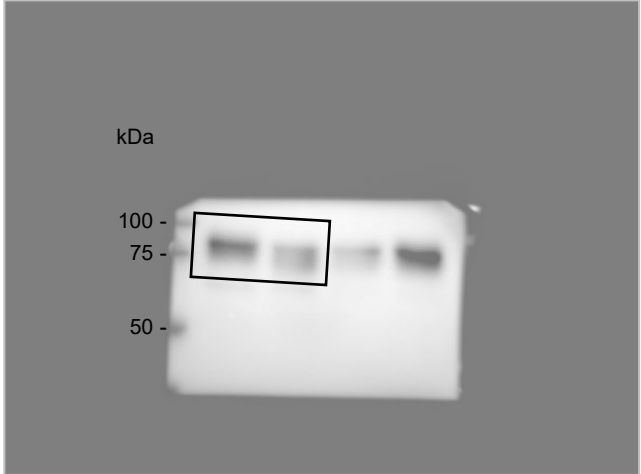

$\alpha$ -Tubulin for FOXJ3

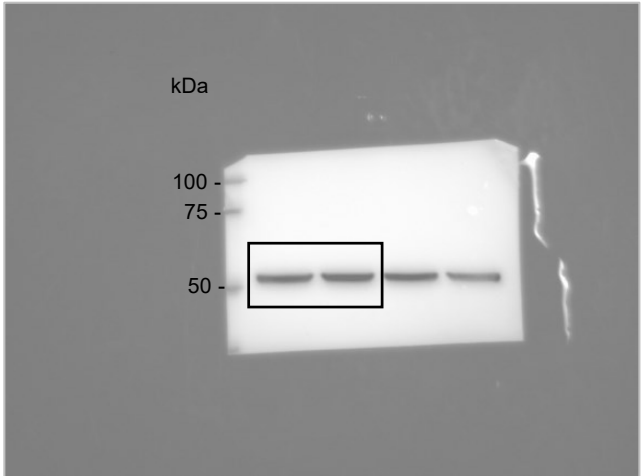

Figure S1E

HCT116 - Scr\_KD and miR-27a\_KD

FOXJ3

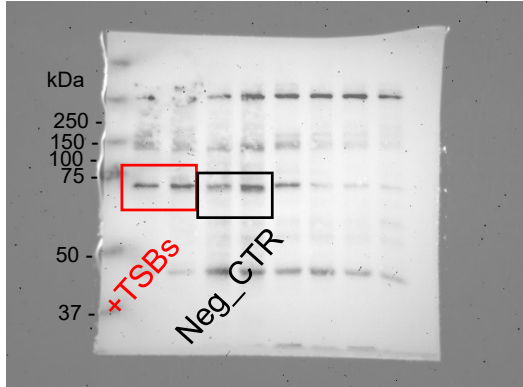

$\alpha$ -Tubulin for FOXJ3

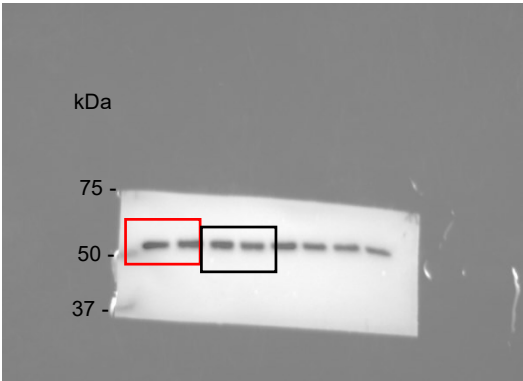

HT29 - Scr\_OE and miR-27a\_OE

FOXJ3

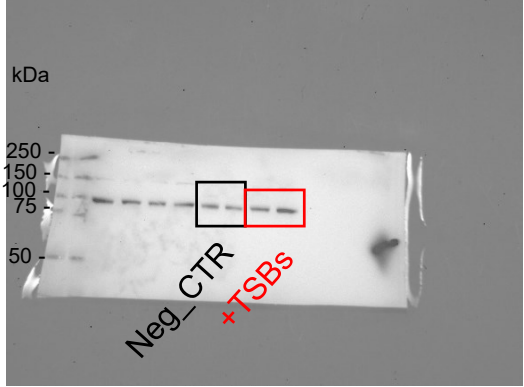

$\alpha$ -Tubulin for FOXJ3

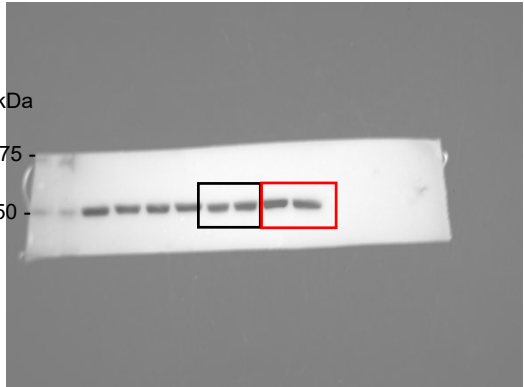

## Figure S2

Panel **A** (HCT116 - Scr\_KD and miR-27a\_KD)

PGC1- $\alpha$

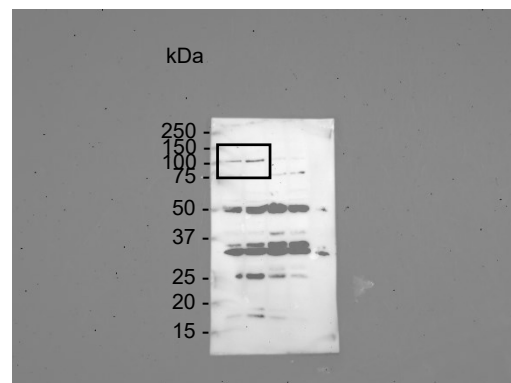

NRF1

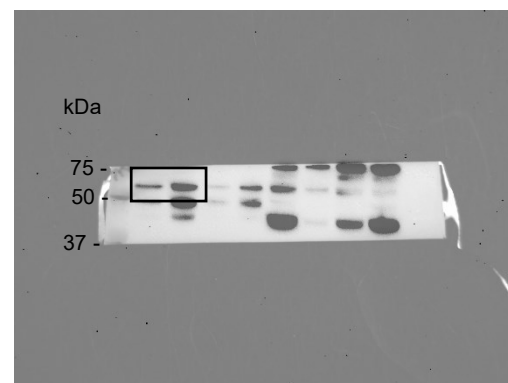

TFAM

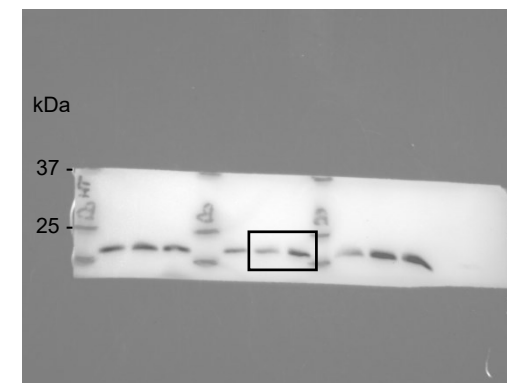

$\alpha$ -Tubulin for PGC1- $\alpha$  (not shown)

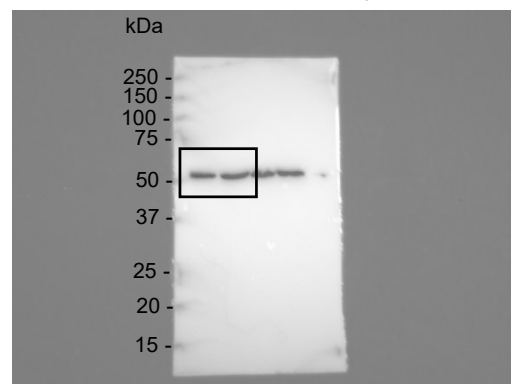

$\alpha$ -Tubulin for NRF1

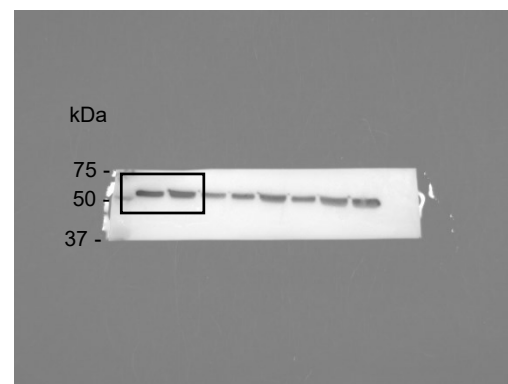

$\alpha$ -Tubulin for TFAM (not shown)

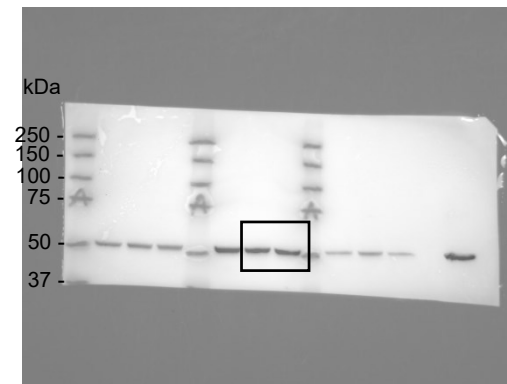

## Figure S2

Panel A (HT29 - Scr\_OE and miR-27a\_OE)

PGC-1 $\alpha$

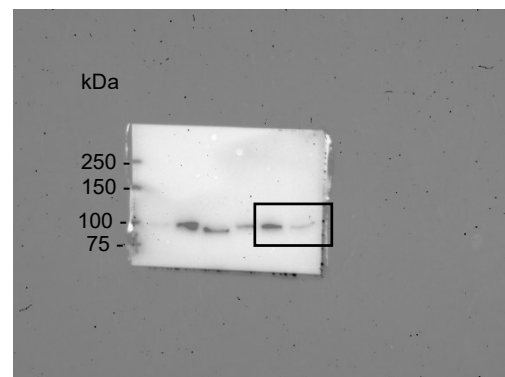

NRF1

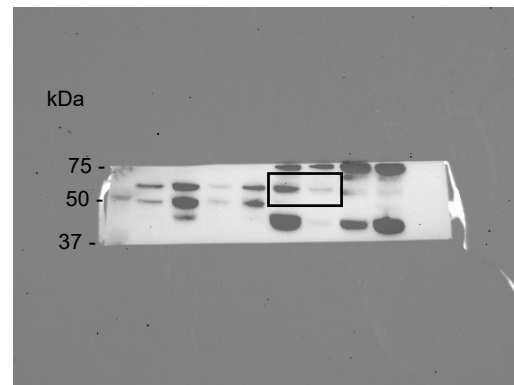

TFAM

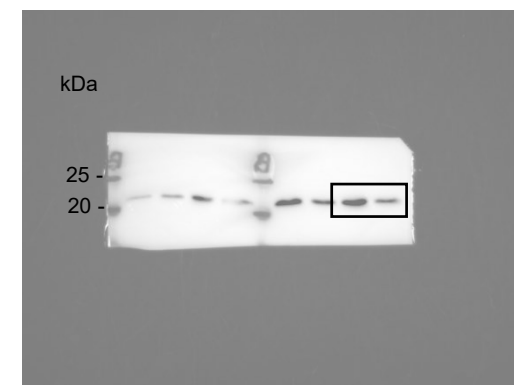

$\alpha$ -Tubulin for PGC1-  $\alpha$  (not shown)

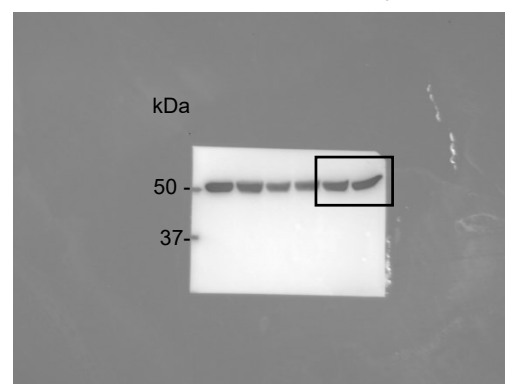

$\alpha$ -Tubulin for NRF1 (not shown)

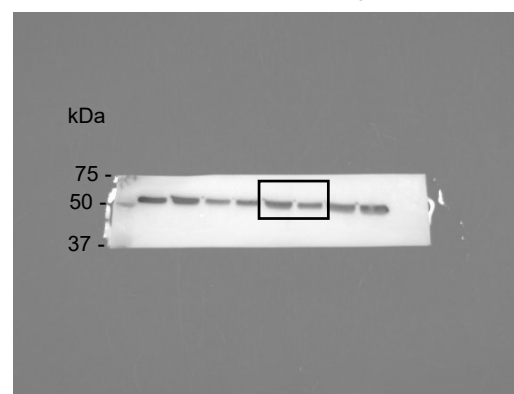

$\alpha$ -Tubulin for TFAM

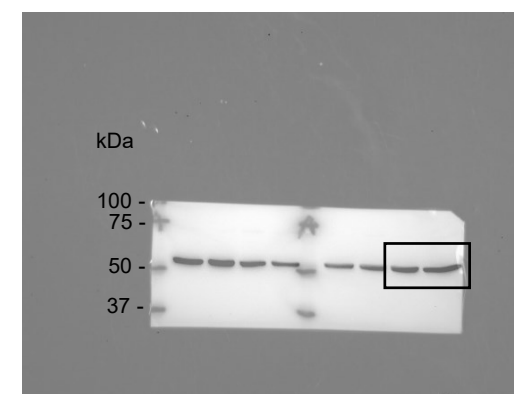

## Figure S2

Panel C (HCT116 - Scr\_KD and miR-27a\_KD)

PGC1- $\alpha$

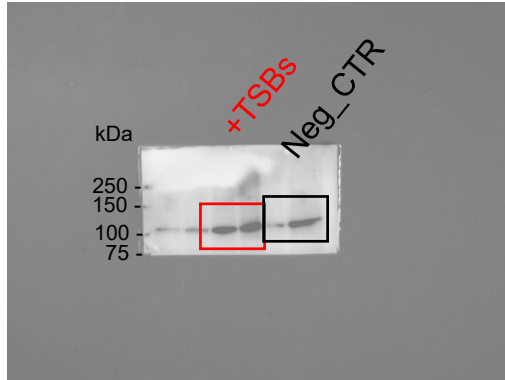

NRF1

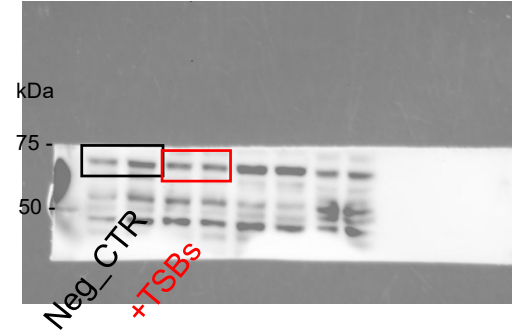

TFAM

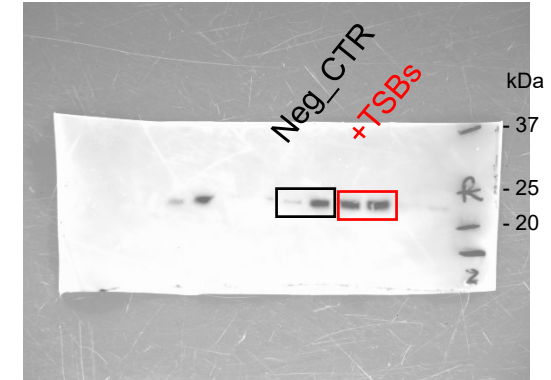

$\alpha$ -Tubulin for PGC1- $\alpha$  (not shown)

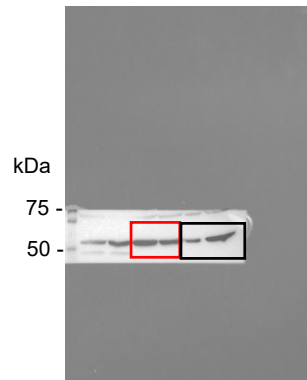

$\alpha$ -Tubulin for NRF1

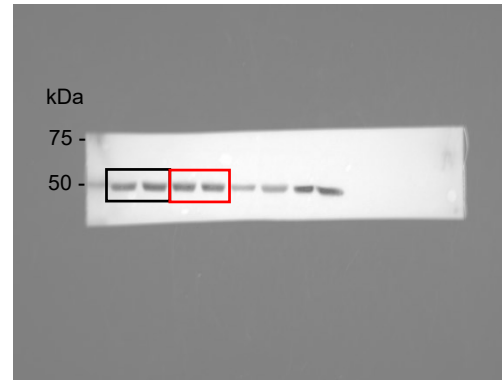

$\alpha$ -Tubulin for TFAM (not shown)

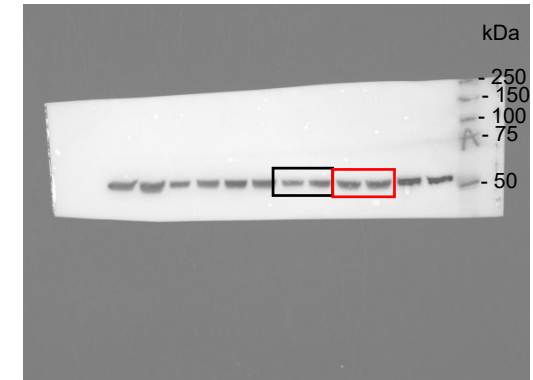



## Figure S2

Panel C (HT29 - Scr\_OE and miR-27a\_OE)

PGC-1 $\alpha$

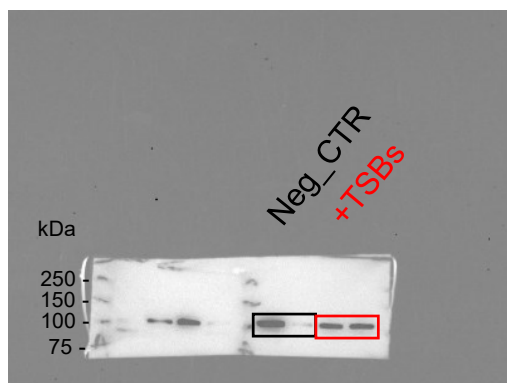

NRF1

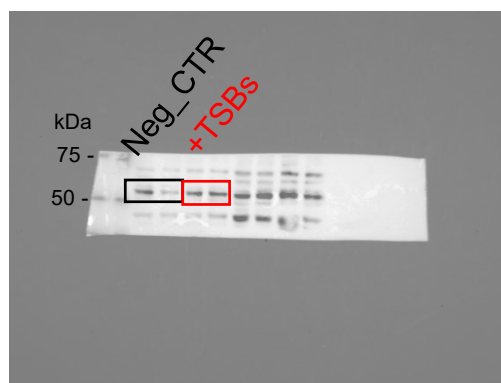

TFAM

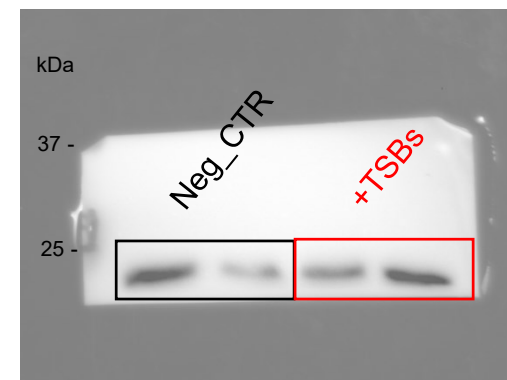

$\alpha$ -Tubulin for PGC-1  $\alpha$  (not shown)

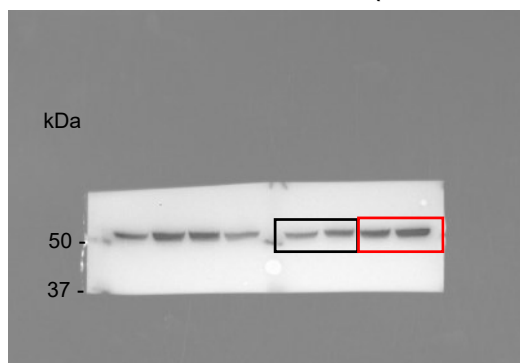

$\alpha$ -Tubulin for NRF1

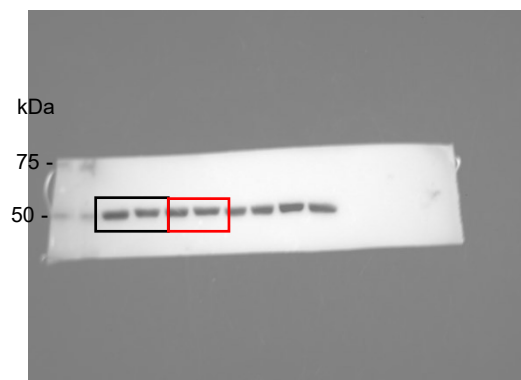

$\alpha$ -Tubulin for TFAM (not shown)

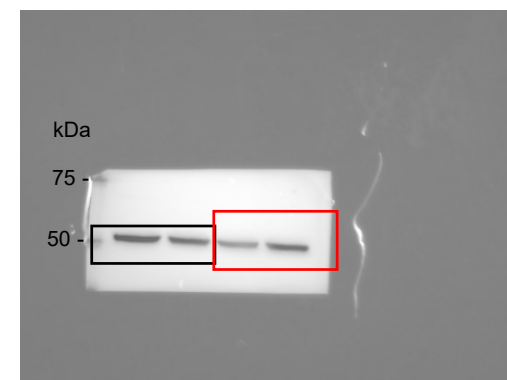

**Figure S3**  
**Panel B**

HCT116 - Scr\_KD and miR-27a\_KD

OXPHOS

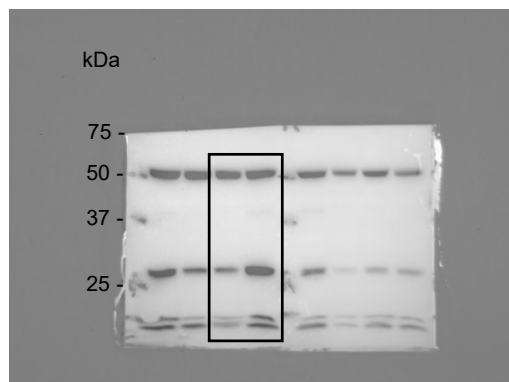

$\alpha$ -Tubulin for OXPHOS

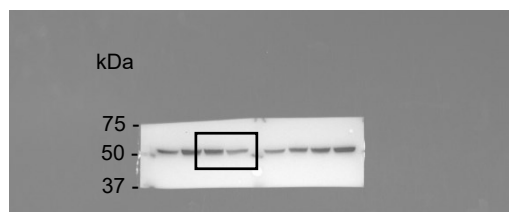

HT29 - Scr\_OE and miR-27a\_OE

OXPHOS

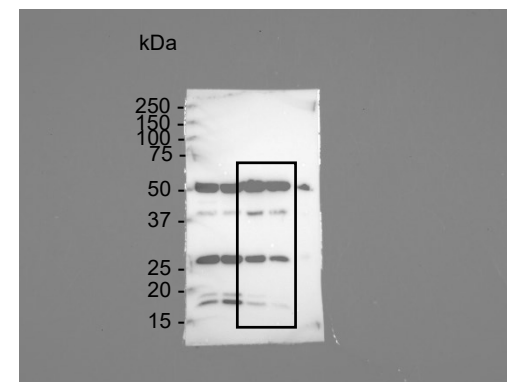

$\alpha$ -Tubulin for OXPHOS

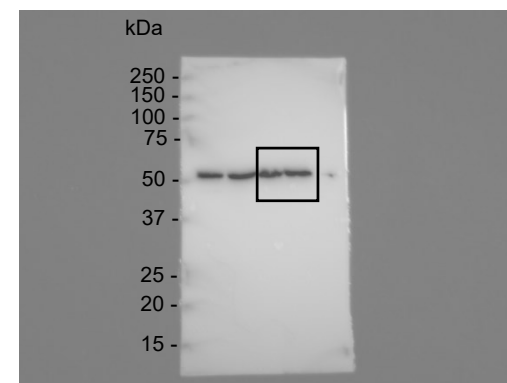

## Figure S3

Upper panel **D** (HCT116 - Scr\_KD and miR-27a\_KD)

MFN1

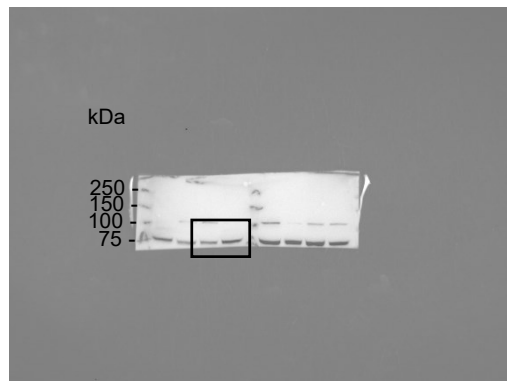

MFN2

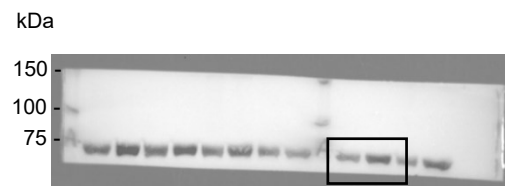

OPA1

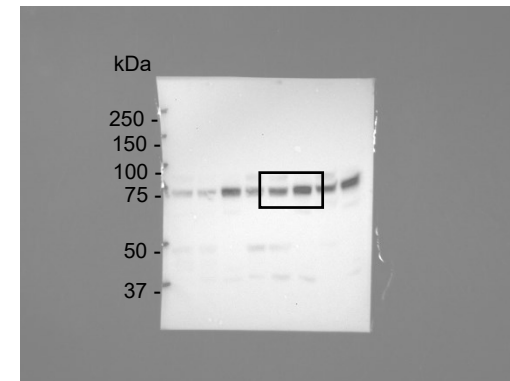

$\alpha$ -Tubulin for MFN1 (not shown)

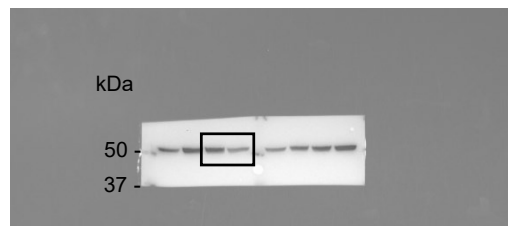

$\alpha$ -Tubulin for MFN2

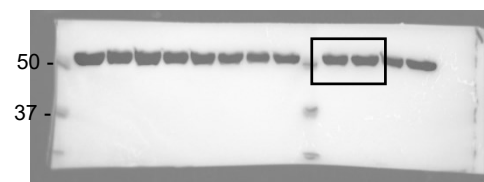

$\alpha$ -Tubulin for OPA1 (not shown)

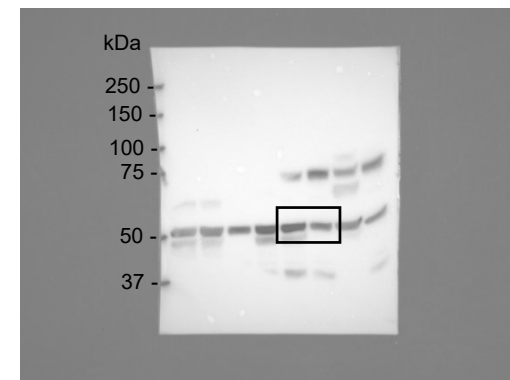

Figure S3

Lower panel D

(HCT116 - Scr\_KD and miR -27a\_KD)

MFF

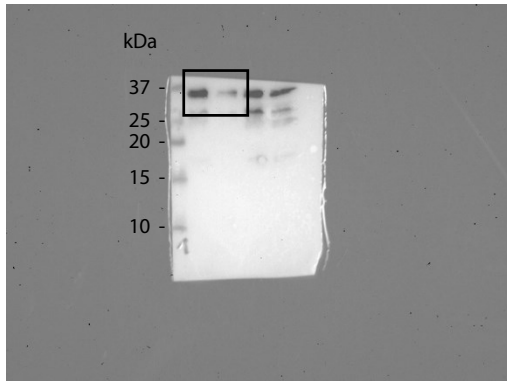

$\alpha$ -Tubulin for MFF ( not shown)

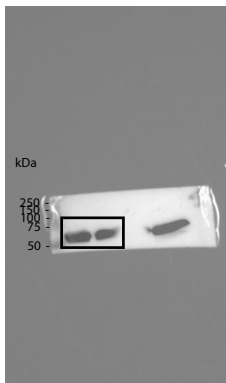

p-DRP1 (S616)

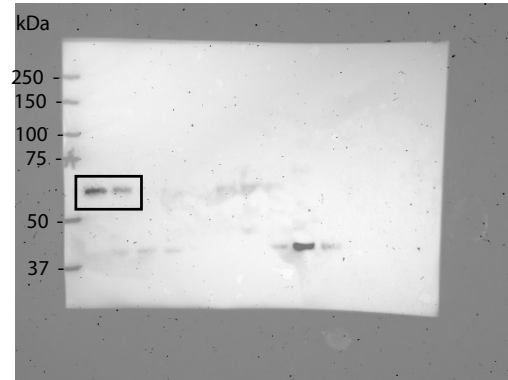

DRP1

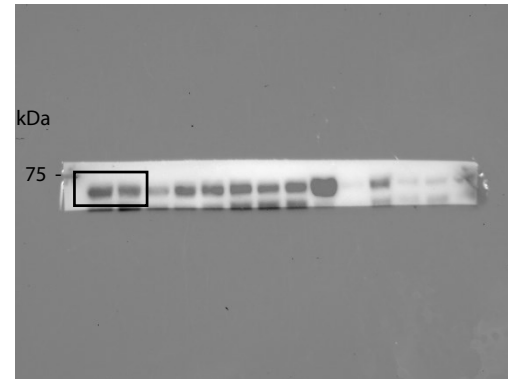

$\alpha$ -Tubulin for p-DRP1 (S616) and DRP1 ( not shown)

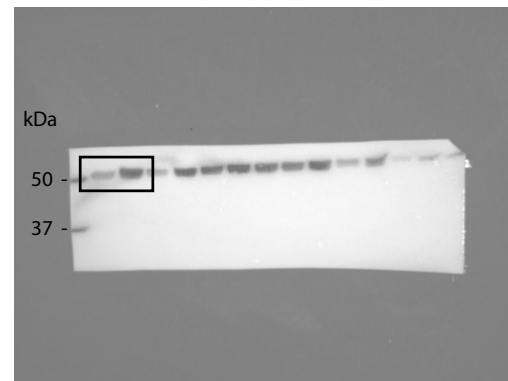

p-DRP1 (S637)

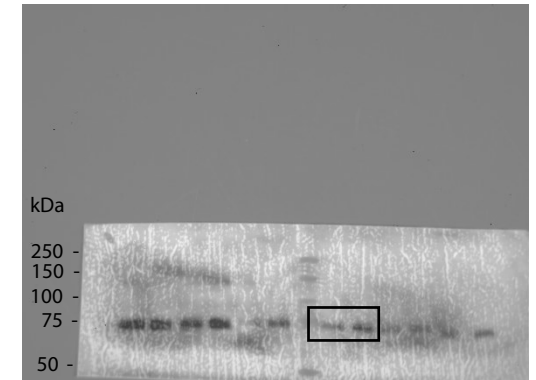

DRP1 ( not shown)

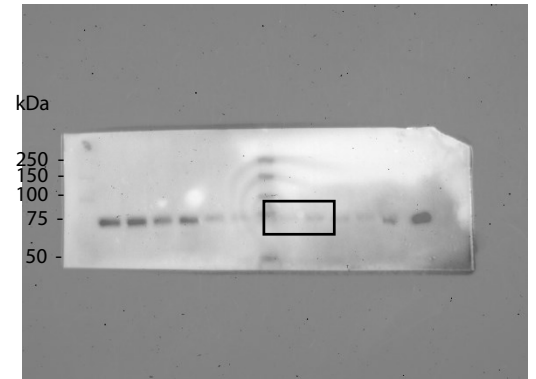

$\alpha$ -Tubulin for p-DRP1 (S637) and DRP1

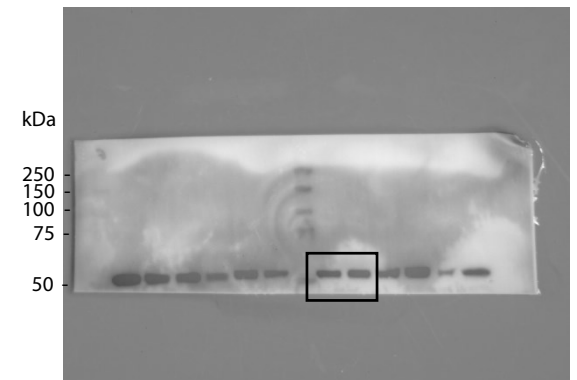

## Figure S3

Upper panel **D** (HT29 - Scr\_OE and miR-27a\_OE)

MFN1

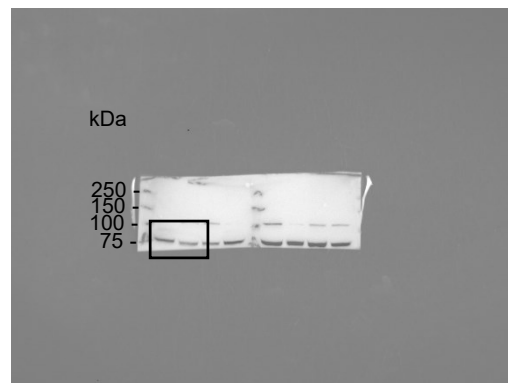

MFN2

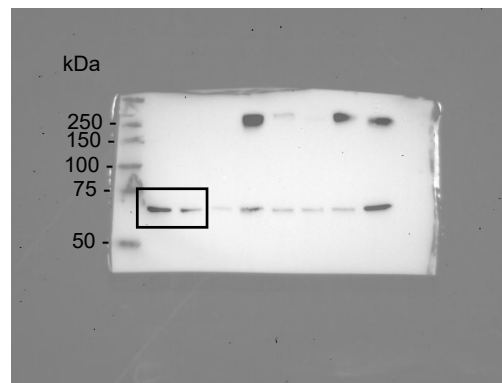

OPA1

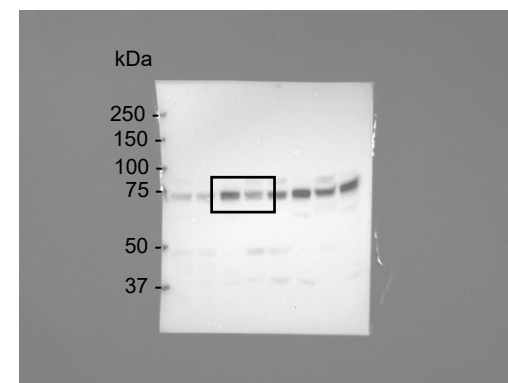

$\alpha$ -Tubulin for MFN1 (not shown)

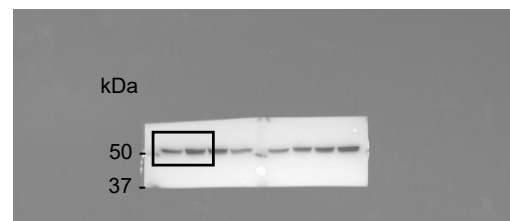

$\alpha$ -Tubulin for MFN2

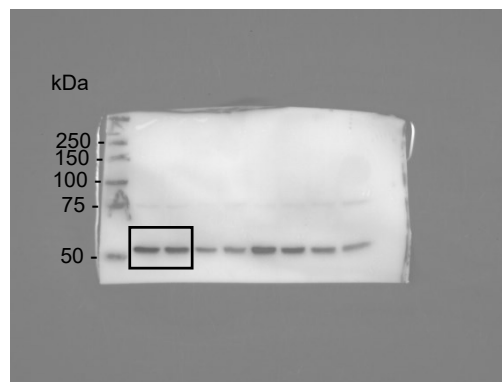

$\alpha$ -Tubulin for OPA1 (not shown)

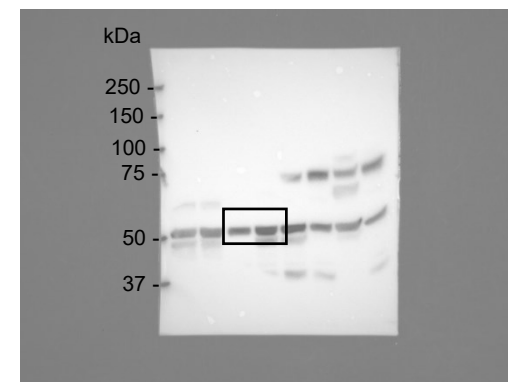

### Figure S3

Lower panel **D**

(HT29 - Scr\_OE and miR-27a\_OE)

MFF

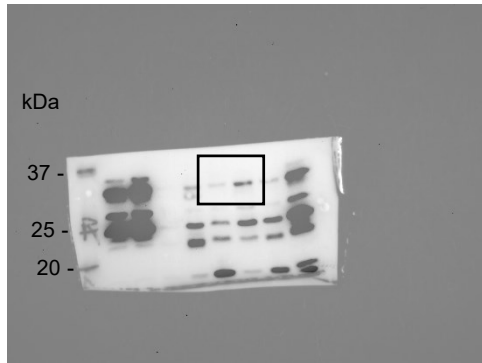

$\alpha$ -Tubulin for MFF

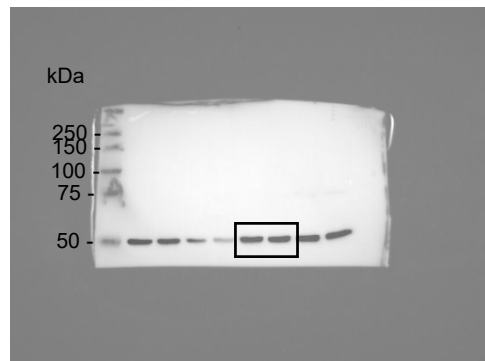

p-DRP1 (S616)

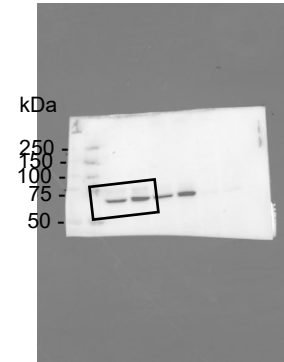

DRP1

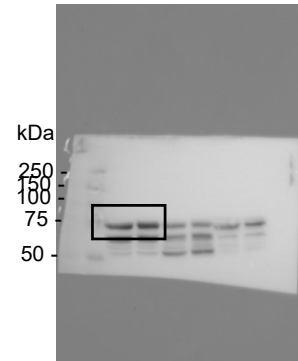

$\alpha$ -Tubulin for p-DRP1 (S616)  
and DRP1 (not shown)

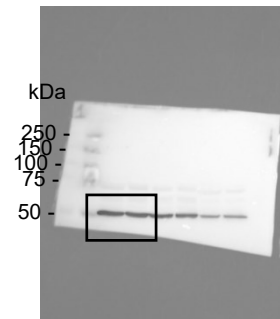

p-DRP1 (S637) flipped

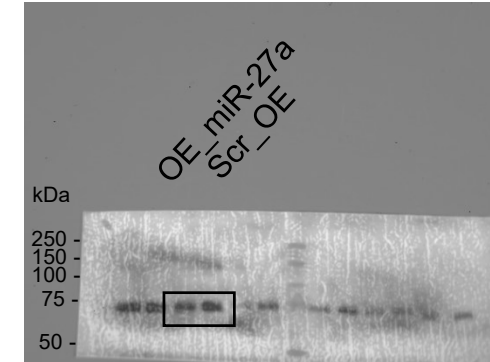

DRP1 flipped

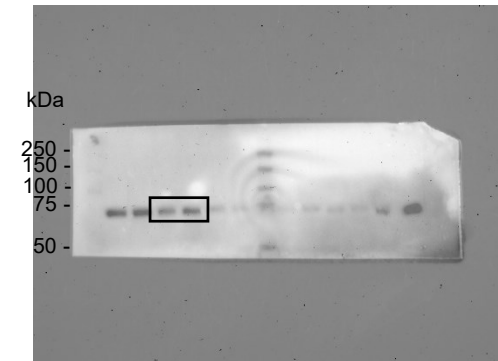

$\alpha$ -Tubulin for p-DRP1 (S637) and DRP1  
flipped (not shown)

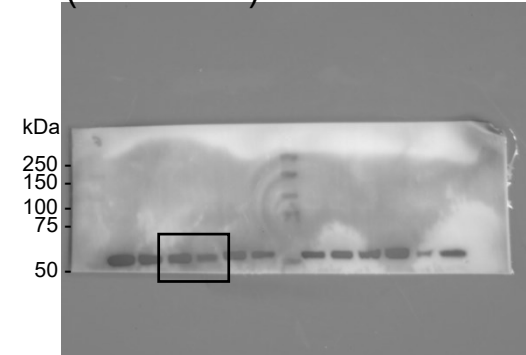

**Figure 6 A**  
(HCT116)

FOXJ3

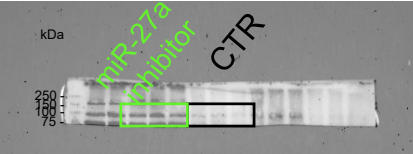

NRF1

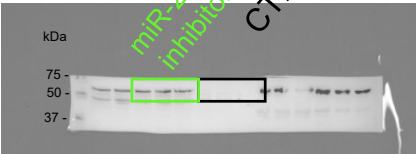

SDHB

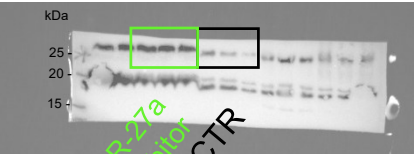

COX II

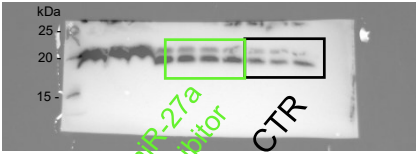

$\beta$ -Actin for FOXJ3, NRF1 and SDHB (not shown)

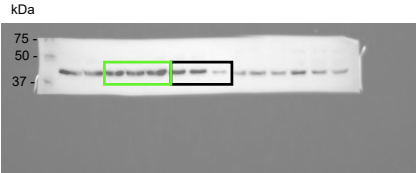

$\beta$ -Actin for COX II

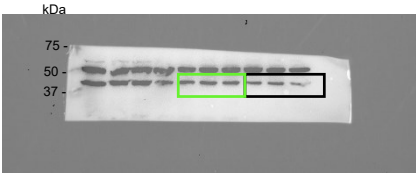

(HT29)

FOXJ3

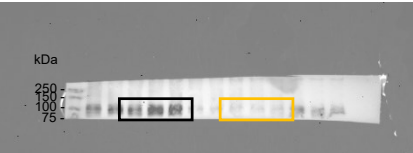

NRF1

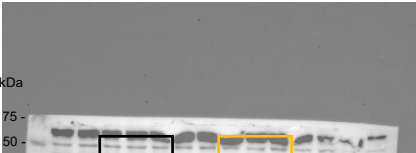

SDHB

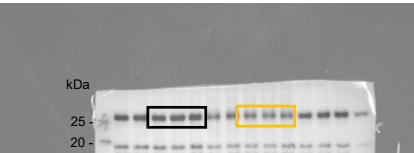

COX II

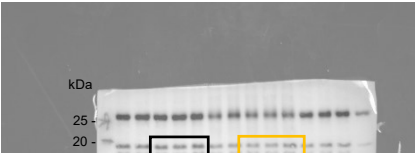

$\beta$ -Actin

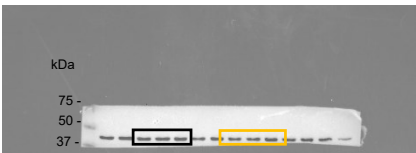



Supplementary Figure S1B

HCT116

FOXJ3

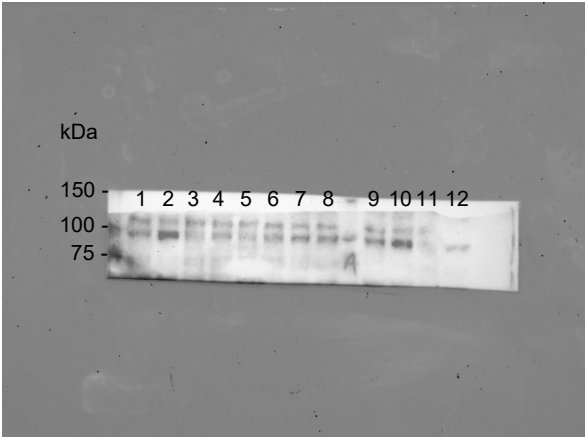

Order shown in the figure:

- 9: Scr\_KD
- 10: mir-27a\_KD
- 1: Scr\_KD + Neg\_CTR
- 2: mir-27a\_KD + Neg\_CTR
- 3: Scr\_KD + TSB1
- 4: mir-27a\_KD + TSB1
- 5: Scr\_KD + TSB2
- 6: mir-27a\_KD + TSB2
- 7: Scr\_KD + TSBs
- 8: mir-27a\_KD + TSBs
- 11 and 12: not shown

α-Tubulin for FOXJ3

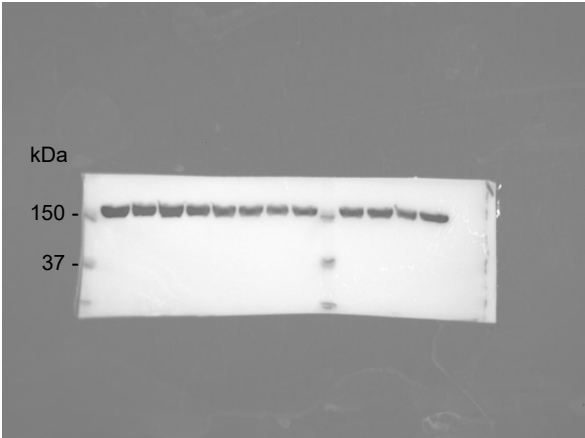

HT29

FOXJ3

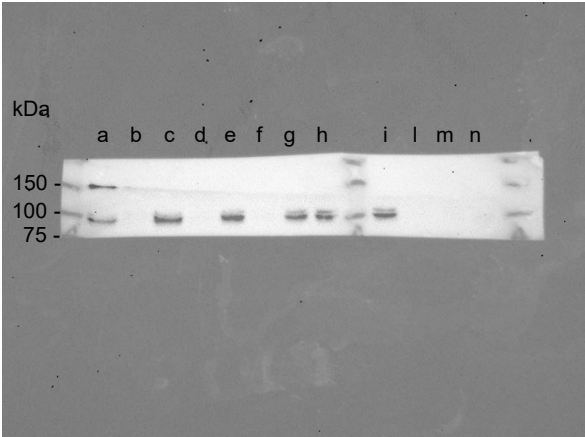

Order shown in the figure:

- i: Scr\_OE
- l: mir-27a\_OE
- a: Scr\_OE + Neg\_CTR
- b: mir-27a\_OE + Neg\_CTR
- c: Scr\_OE + TSB1
- d: mir-27a\_OE + TSB1
- e: Scr\_OE + TSB2
- f: mir-27a\_OE + TSB2
- g: Scr\_OE + TSBs
- h: mir-27a\_OE + TSBs
- m and n: not shown

α-Tubulin for FOXJ3

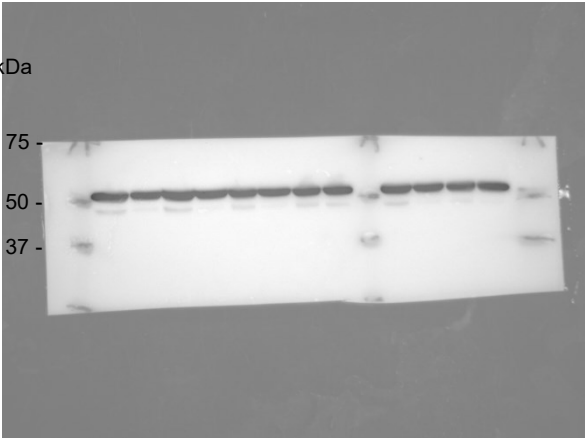

Supplement: s1 [file s1]
